# Supplementary material for: Regulation of macrophage uptake through the bio-nano interaction using surface functionalized mesoporous silica nanoparticles with large radial pores
Source: Royal Society of Chemistry journal article supplement (doi:10.1039/d4tb01124d), 2024-10-29
Supplement: d4tb01124d1.pdf [file d4tb01124d1.pdf]

## Supplemental information

### Title: Regulation of Macrophage Uptake Through the Bio-nano Interaction Using Surface Functionalized Mesoporous Silica Nanoparticles with Large Radial Pores

Juan Wen<sup>1,2</sup>, Chang Lei<sup>3,4,6\*</sup>, Shu Hua<sup>1,2</sup>, Larry Cai<sup>3</sup>, Huan Dai<sup>1,2</sup>, Siyuan Liu<sup>1,2,5,6</sup>, Yiwei Li<sup>3,4</sup>, Saso Ivanovski<sup>1,2</sup>, Chun Xu<sup>1,2,5,6\*</sup>

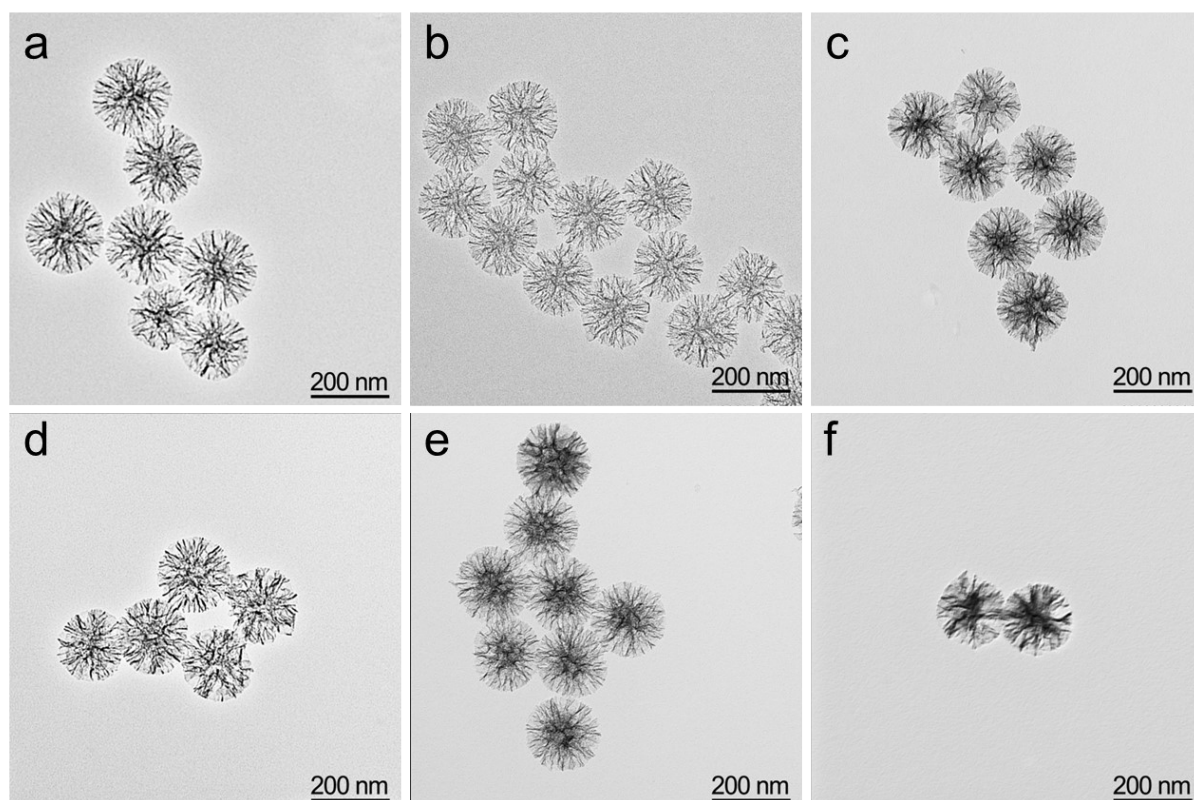

**Fig. S1** TEM images of MSN-CC (a), MSN-CC-PO<sub>4</sub> (b), MSN-CC-NH<sub>2</sub> (c), MSN-CC-SH (d), MSN-CC-PEI (e) and MSN-CC-PEG<sub>2k</sub> (f).

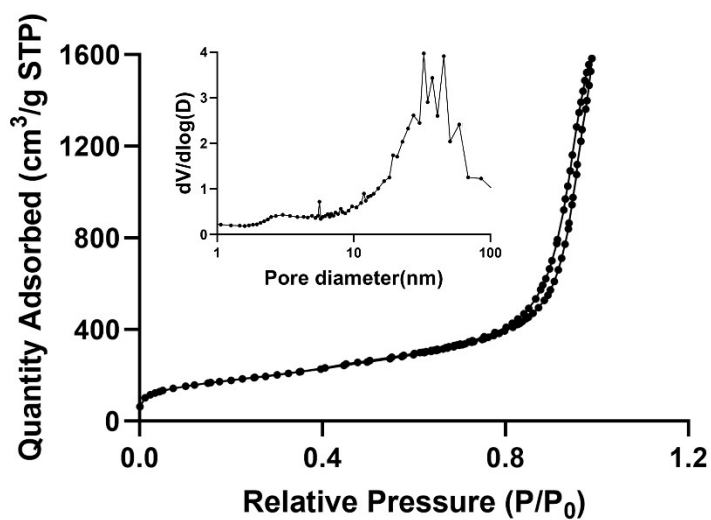

Fig.S2 N<sub>2</sub> sorption isotherm and pore size distribution curve for MSN-CC

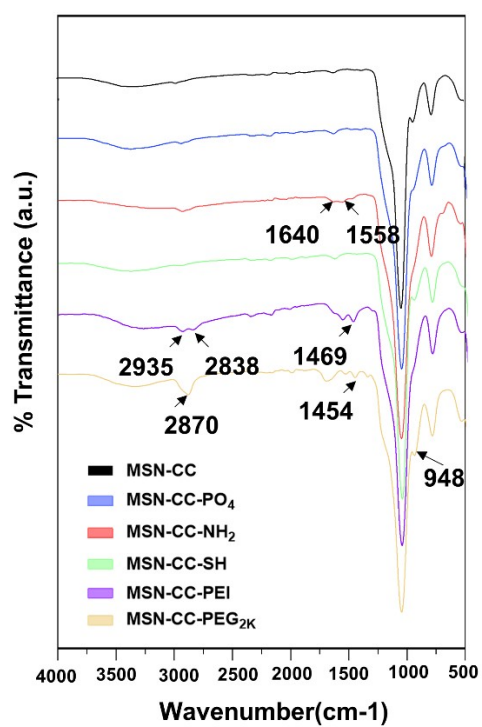

Fig. S3 Fourier transform infrared (FTIR) spectra of MSN-CC and surface-modified MSN-CC nanoparticles.

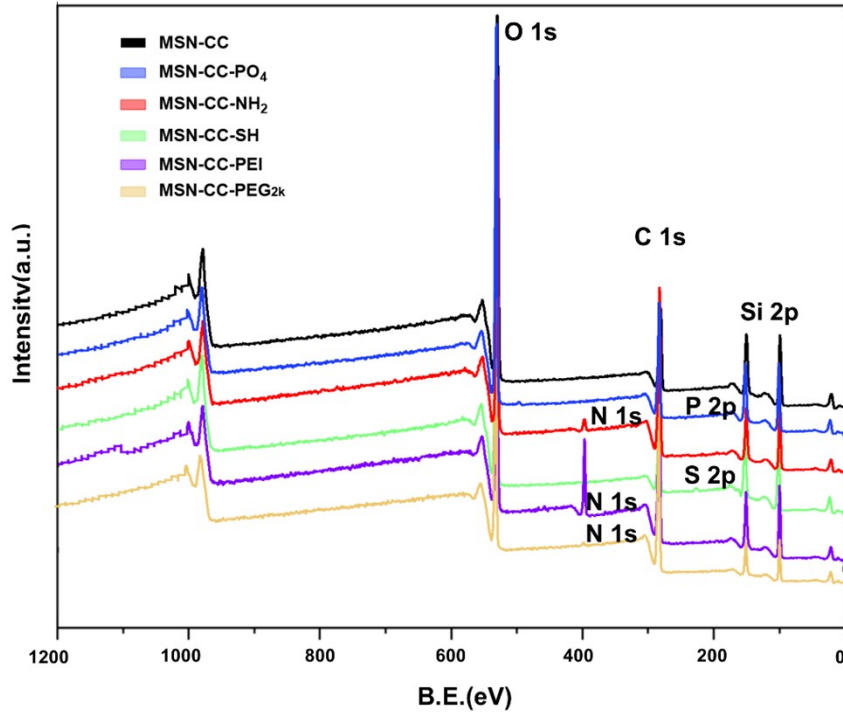

Fig. S4 XPS spectra of MSN-CC and surface-modified MSN-CC.

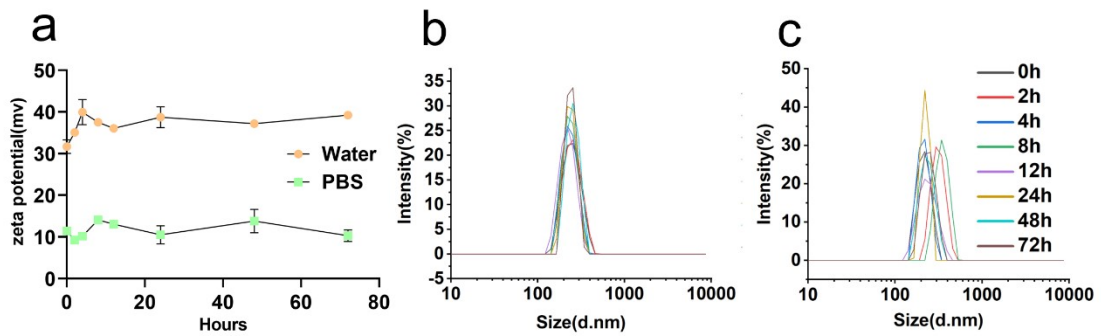

Fig. S5 Time-dependent zeta potential and hydrodynamic diameters of MSN-CC-PEI in both Milli-Q water and PBS (pH 7.4). (a) Zeta potential of MSN-CC-PEI in Milli-Q water and PBS. (b) Hydrodynamic diameters of MSN-CC-PEI in Milli-Q water at different time points. (c) Hydrodynamic diameters of MSN-CC-PEI in PBS (pH 7.4) at different time points.

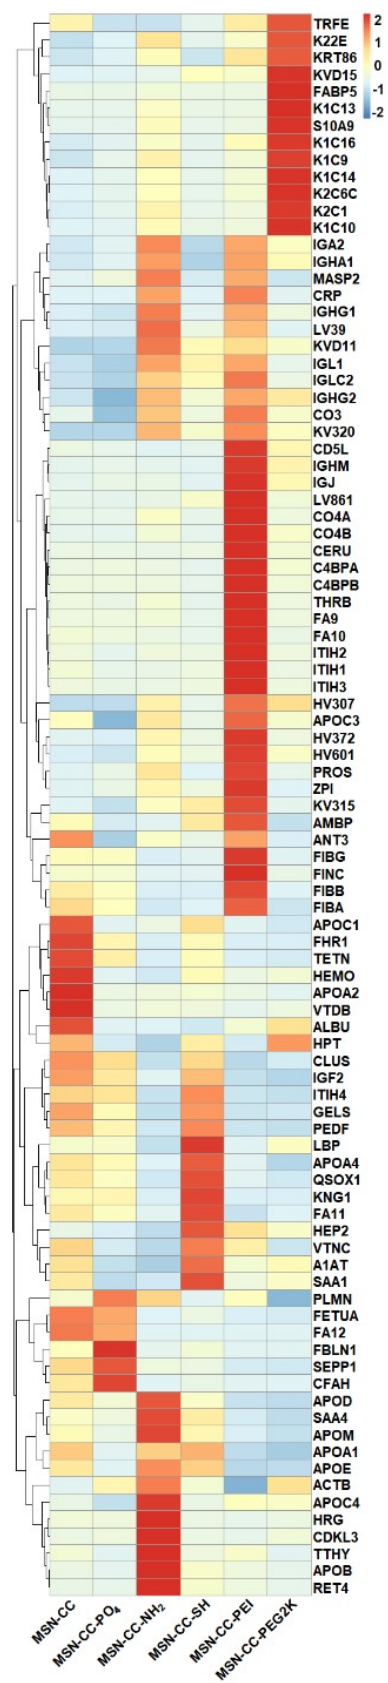

Fig. S6 Heat map of the top 5% protein in the protein corona around surface modified MSN-CC.

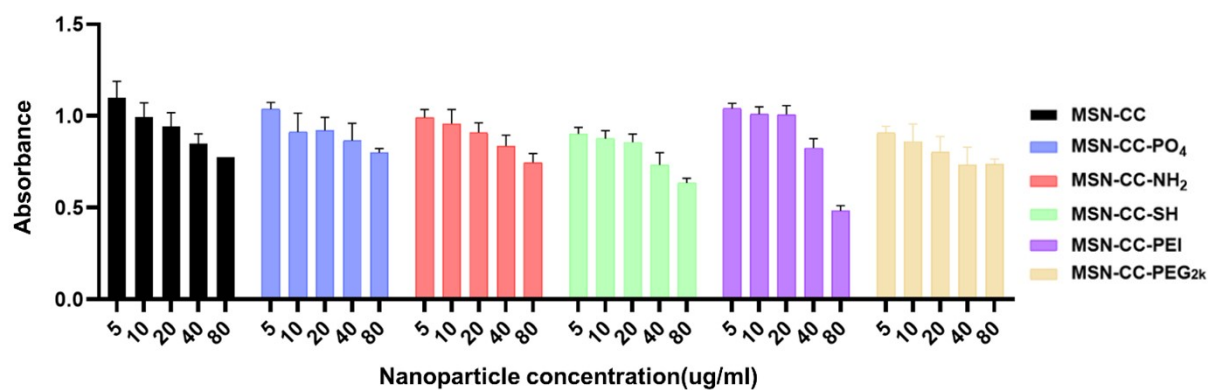

Fig. S7 Cell toxicity testing with MTT assays after Raw 264.7 being treated with surface-modified MSN-CC for 24 hours.

Table S1. Atomic percentage composition in the functionalized MSN-CC measured by XPS

| Nanoparticles            | Atomic concentration (%) |       |       |      |      |      |
|--------------------------|--------------------------|-------|-------|------|------|------|
|                          | Si 2p                    | C 1s  | O 1s  | N 1s | P 2p | S 2p |
| MSN-CC                   | 25.82                    | 30.31 | 43.87 | -    | -    | -    |
| MSN-CC-PO <sub>4</sub>   | 21.86                    | 38.59 | 39.55 | -    | -    | -    |
| MSN-CC-NH <sub>2</sub>   | 17.50                    | 47.53 | 33.07 | 1.90 | -    | -    |
| MSN-CC-SH                | 27.63                    | 27.50 | 43.55 | -    | -    | 1.32 |
| MSN-CC-PEI               | 15.19                    | 48.49 | 28.25 | 8.08 | -    | -    |
| MSN-CC-PEG <sub>2k</sub> | 11.23                    | 57.00 | 31.44 | 0.34 | -    | -    |

Table S2. TGA analysis of MSN-CC and surface functionalized MSN-CC nanoparticles

| Nanoparticles | Surface modification grafted onto MSN-CC (%) |                       |  |
|---------------|----------------------------------------------|-----------------------|--|
|               | Weight loss at 100 °C                        | Weight loss at 900 °C |  |
|               |                                              |                       |  |

|                          | (%)  | (%)   |        |
|--------------------------|------|-------|--------|
| MSN-CC                   | 4.9% | 7.8%  |        |
| MSN-CC-PO <sub>4</sub>   | 4.7% | 9.9%  | 2.1%   |
| MSN-CC-NH <sub>2</sub>   | 4.4% | 15%   | 7.2%   |
| MSN-CC-SH                | 3.3% | 9.2%  | 1.4%   |
| MSN-CC-PEI               | 9.1% | 43.8% | 36.0 % |
| MSN-CC-PEG <sub>2k</sub> | 1.1% | 37.8% | 30.0%  |

**Table S3. Summary of zeta potential and polydispersity index (PDI) of MSN-CC-PEI in both milli-Q water and PBS(PH=7.4).**

| Time points(h) | <i>Zeta potential (mv) in water</i> | <i>Zeta potential (mv) in PBS</i> | PDI in water | PDI in PBS  | Hydrodynamic size(nm) in water | Hydrodynamic size(nm) in PBS |
|----------------|-------------------------------------|-----------------------------------|--------------|-------------|--------------------------------|------------------------------|
| 0              | 31.7±1.7                            | 11.4±1.0                          | 0.229±0.015  | 0.342±0.037 | 263±4.8                        | 254.5±22.5                   |
| 2              | 35.1±0.6                            | 9.25±0.7                          | 0.178±0.019  | 0.33±0.059  | 265.9±3.1                      | 325±6.7                      |
| 4              | 39.9±3.0                            | 10.17±0.8                         | 0.226±0.022  | 0.344±0.012 | 253.6±5.7                      | 303.8±2.6                    |
| 8              | 37.5±1.0                            | 14.1±0.7                          | 0.341±0.009  | 0.399±0.03  | 299.2±10.7                     | 350.5±19.9                   |
| 12             | 36.1±0.7                            | 13.1±0.7                          | 0.33±0.035   | 0.375±0.024 | 266.6±11.1                     | 279.5±15.5                   |
| 24             | 38.7±2.5                            | 10.5±2.2                          | 0.34±0.032   | 0.429±0.023 | 303.9±13.4                     | 264.1±35                     |
| 48             | 37.2±0.4                            | 13.8±2.8                          | 0.293±0.05   | 0.307±0.004 | 312.3±2.3                      | 291.5±9.1                    |
| 72             | 39.2±0.8                            | 10.31±1.4                         | 0.331±0.077  | 0.425±0.02  | 309.8±13.6                     | 301.2±25.3                   |
